# Supplementary material for: Nickel oxide decorated MoS2nanosheet-based non-enzymatic sensor for the selective detection of glucose
Source: Royal Society of Chemistry journal article supplement (doi:10.1039/c9ra09318d), 2020-01-01
Supplement: c9ra09318d1.pdf [file c9ra09318d1.pdf]

## Supplementary Information

### Nickel Oxide Decorated MoS<sub>2</sub> Nanosheets Based Non-Enzymatic Sensor for Selective Detection of Glucose

**Gayathri Jeevanandham<sup>1</sup>, R. Jerome<sup>1</sup>, N. Murugan<sup>1</sup>, M. Preethika<sup>1</sup>, Kumaran Vediappan<sup>1</sup>  
and Ashok K. Sundramoorthy<sup>1\*</sup>**

<sup>1</sup>Department of Chemistry, SRM Institute of Science and Technology, Kattankulathur-603 203,  
Tamil Nadu, India

\*Corresponding author:

Email: ashokkus@srmist.edu.in ; ashok.sundramoorthy@gmail.com

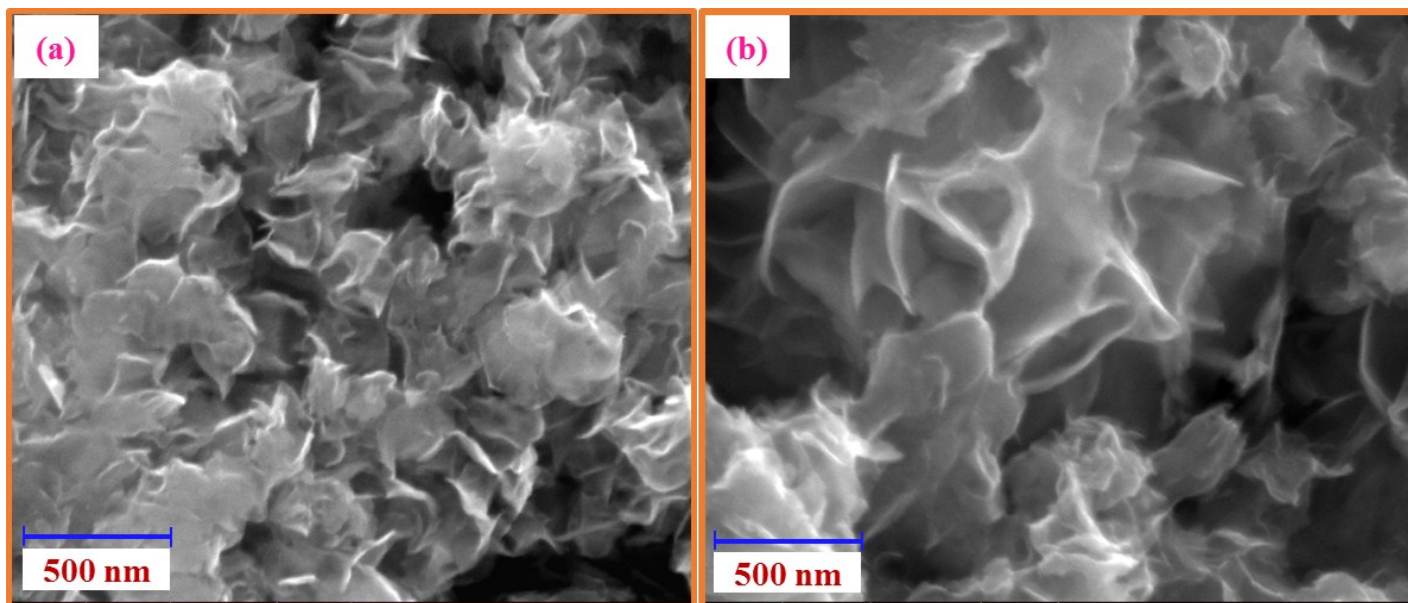

Supplementary Figures

Fig. S1. The high magnification FE-SEM images of MoS<sub>2</sub> and NiO/MoS<sub>2</sub> nanocomposite.

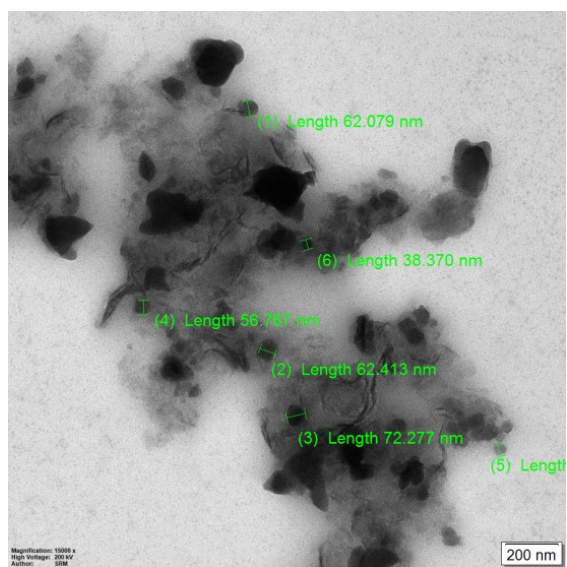

Fig. S2. The HR-TEM images of NiO/MoS<sub>2</sub> nanocomposite with measured particle sizes of NiO.

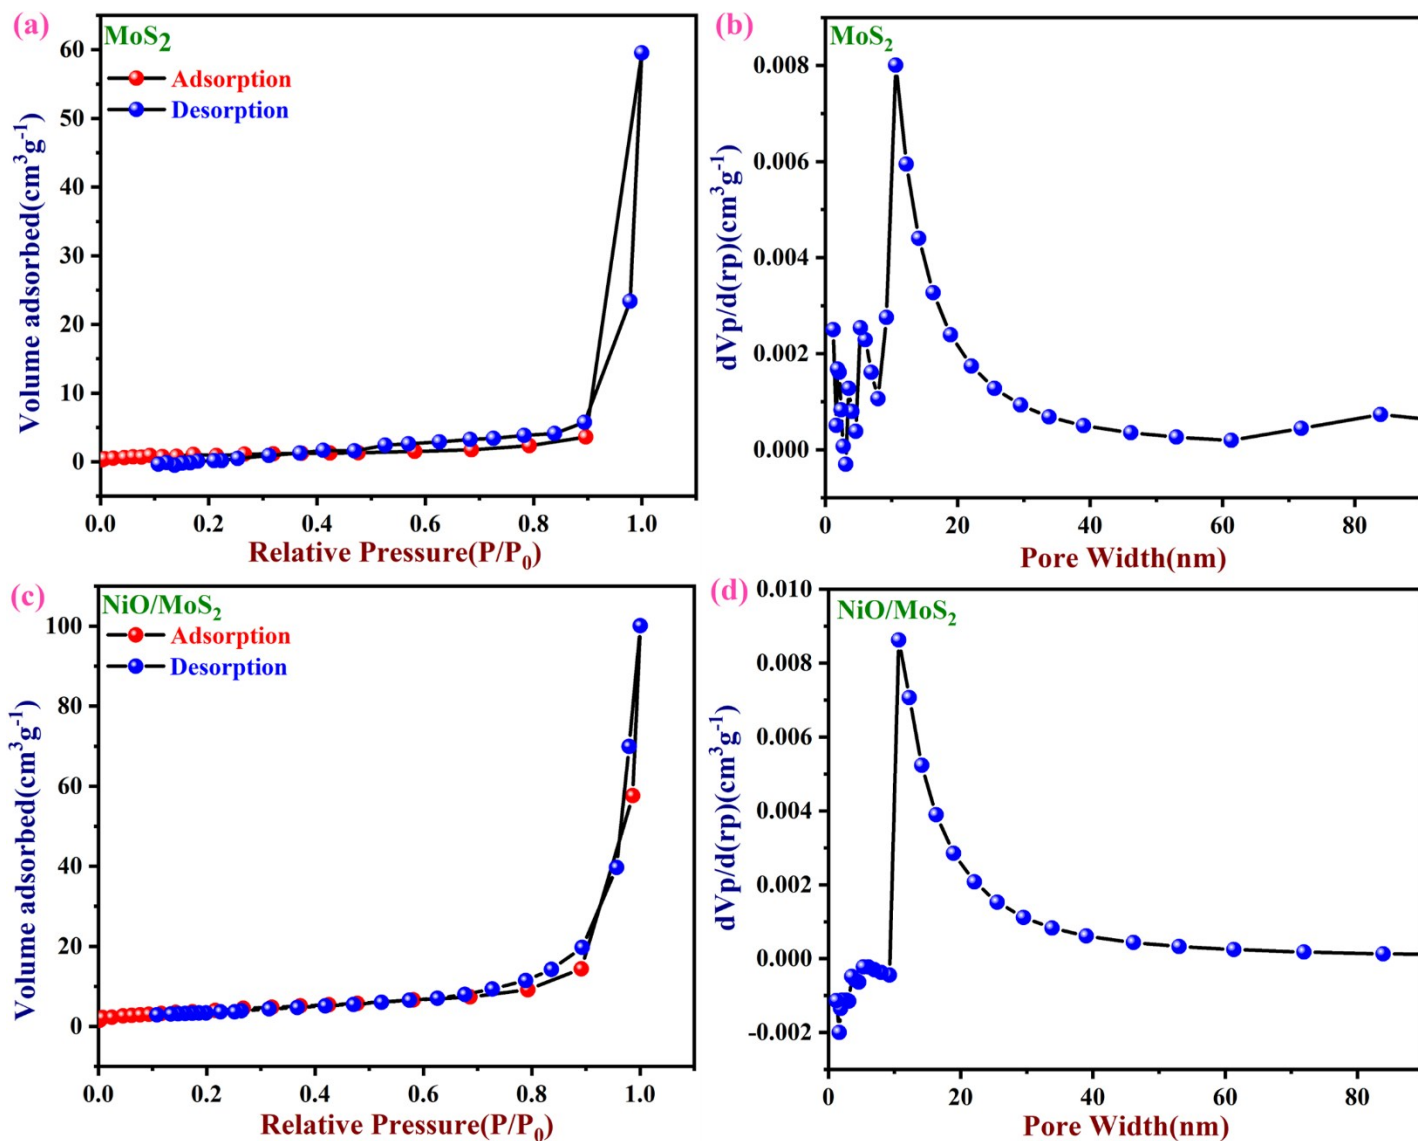

**Fig. S3.** Nitrogen adsorption/desorption isotherms and pore size distribution analysis of the

MoS<sub>2</sub> (a, b) and NiO/MoS<sub>2</sub> nanocomposite (c, d).

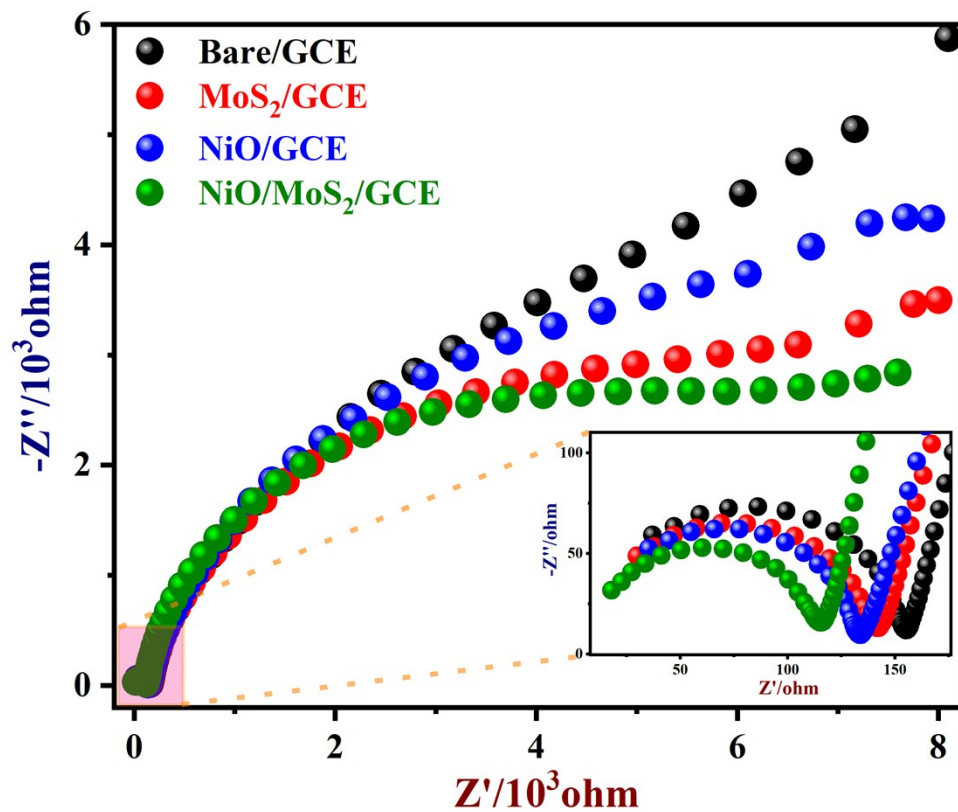

**Fig. S4.** Nyquist plot of NiO/ $\text{MoS}_2/\text{GCE}$ , NiO/GCE,  $\text{MoS}_2/\text{GCE}$  and bare/GCE in 0.1 M KCl containing 5 mM  $[\text{Fe}(\text{CN})_6]^{3-/4-}$  with frequency range from 0.1 Hz to 1000 kHz (inset: enlarged view of high frequency range).

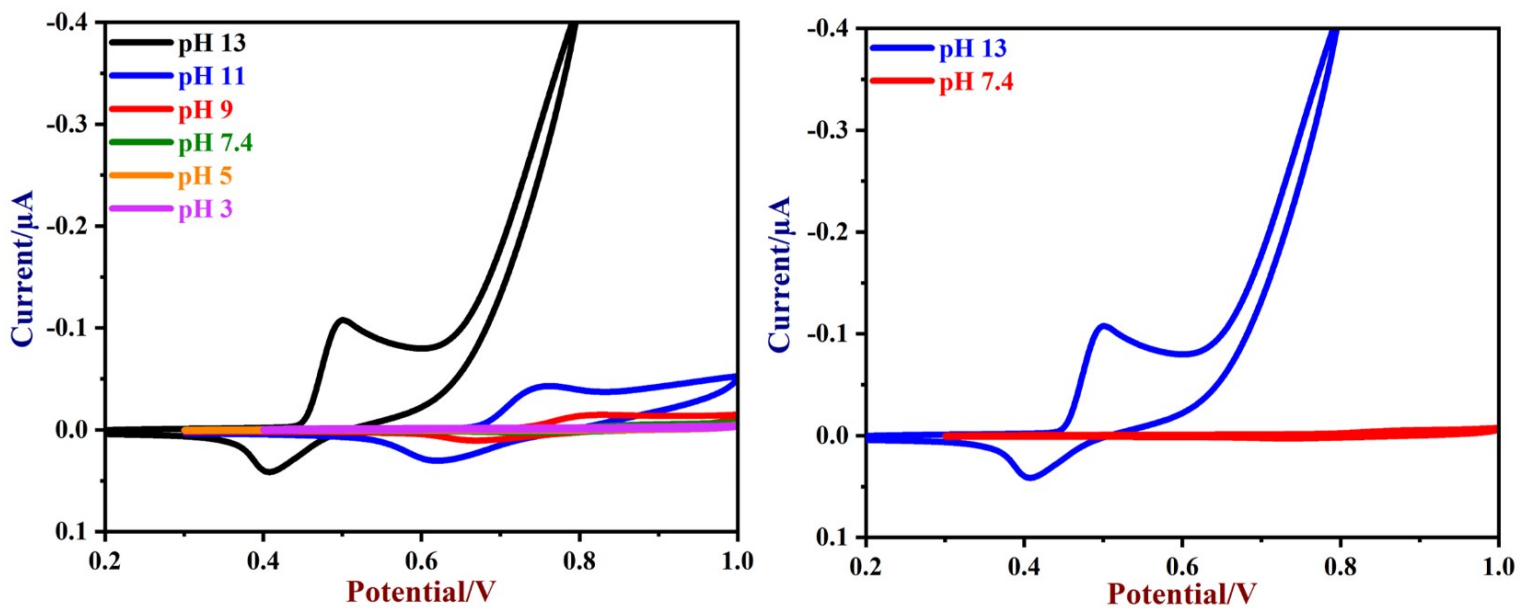

**Fig. S5.** (Left) The effect of pH on the electrochemical oxidation of glucose ( $50 \mu\text{M}$ ) was carried out on NiO/MoS<sub>2</sub>/GCE in 0.1 M NaOH from pH 13 to 3. (Right) Comparison CVs of pH 7.4 and 13 for glucose oxidation ( $50 \mu\text{M}$ ).

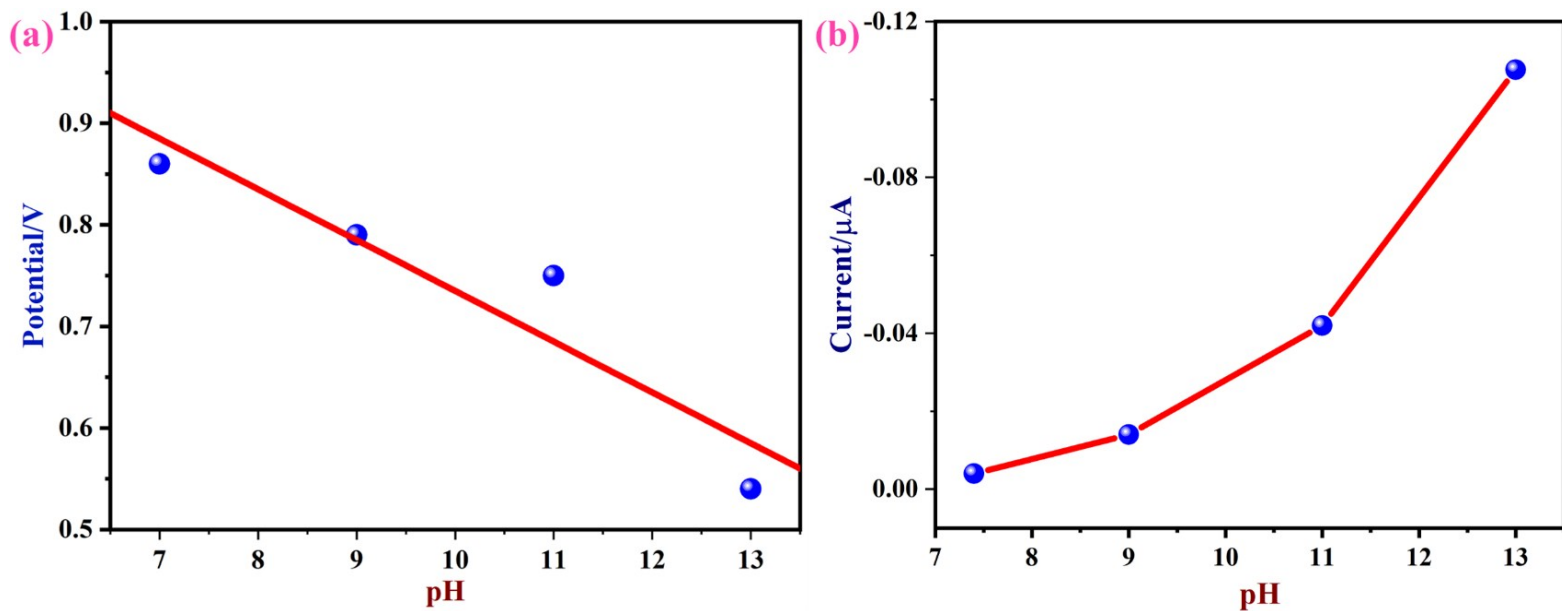

**Fig. S6.** (a) A linear curve shows the changes in oxidation potential of glucose vs. pH of electrolytes. (b) The measured current responses against pH of the solutions for glucose oxidation ( $50 \mu\text{M}$ ).

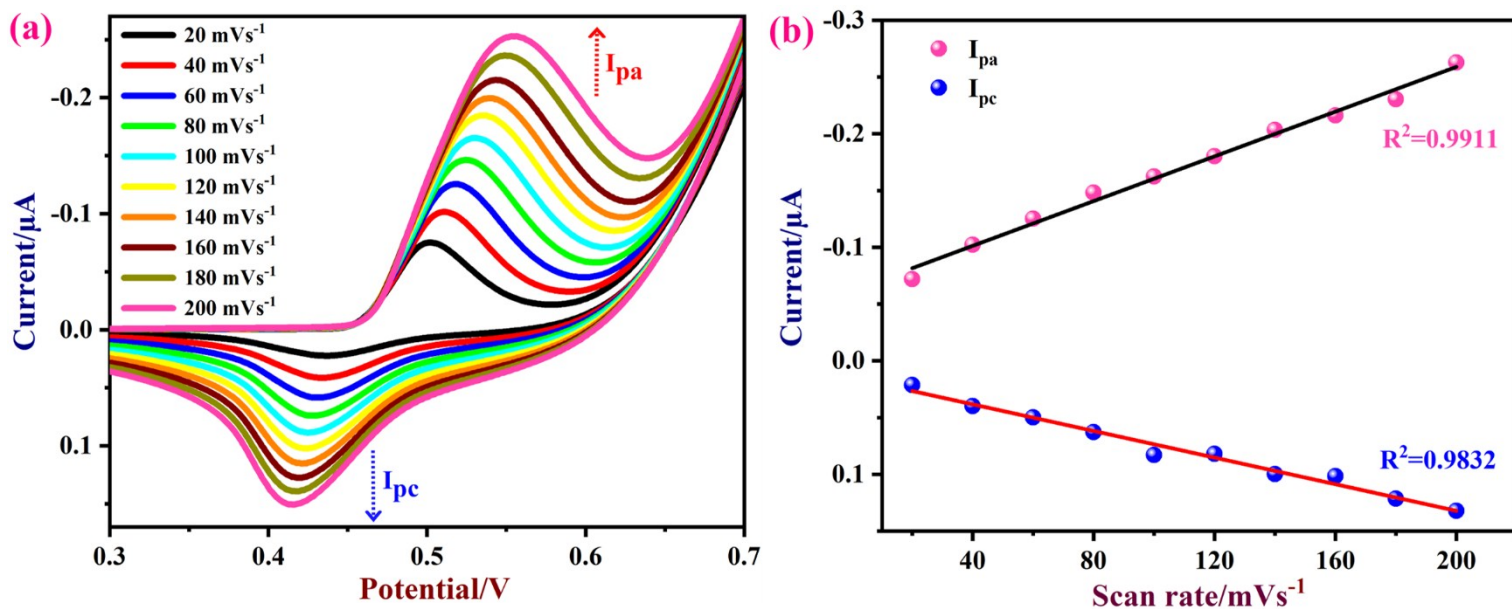

**Fig. S7.** CVs recorded by using (a) NiO/MoS<sub>2</sub>/GCE in 0.1 M NaOH containing 50 μM glucose at various scan rates (from 20 to 200 mVs<sup>-1</sup>). (b) The linear relationship between the scan rate vs. peak currents with a correlation coefficient values of (I<sub>pa</sub>, R<sup>2</sup> = 0.9911 and I<sub>pc</sub>, R<sup>2</sup> = 0.9832).

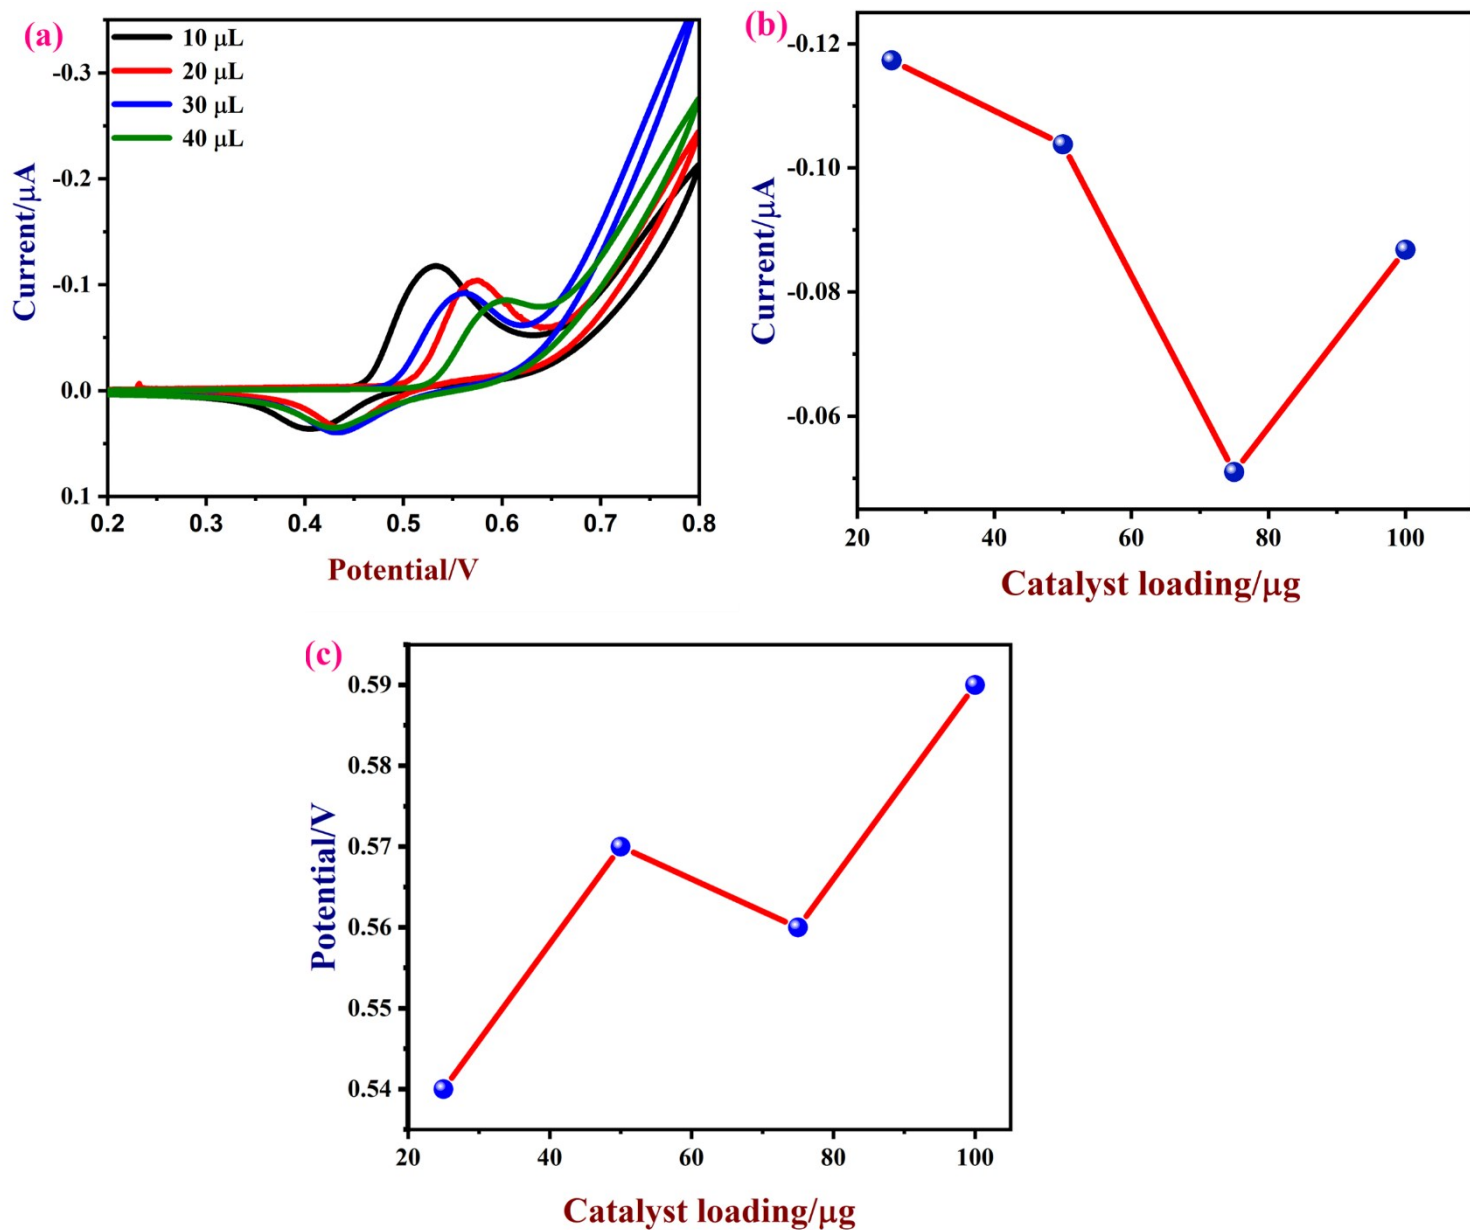

**Fig. S8.** (a) The effects of catalyst loading of NiO/MoS<sub>2</sub> (stock solution=2.5 mg/mL) on GCE surface as 25 (10  $\mu\text{L}$ ), 50 (20  $\mu\text{L}$ ), 75 (30  $\mu\text{L}$ ) and 100  $\mu\text{g}$  (40  $\mu\text{L}$ ) on the oxidation of 50  $\mu\text{M}$  glucose. (b) Anodic peak current ( $I_{\text{pa}}$ ) of glucose vs. various amounts of catalyst loaded NiO/MoS<sub>2</sub>/GCE. (c) The relationship between the  $E_{\text{pa}}$  of glucose oxidation vs. amount of catalysts on NiO/MoS<sub>2</sub> modified GCE.



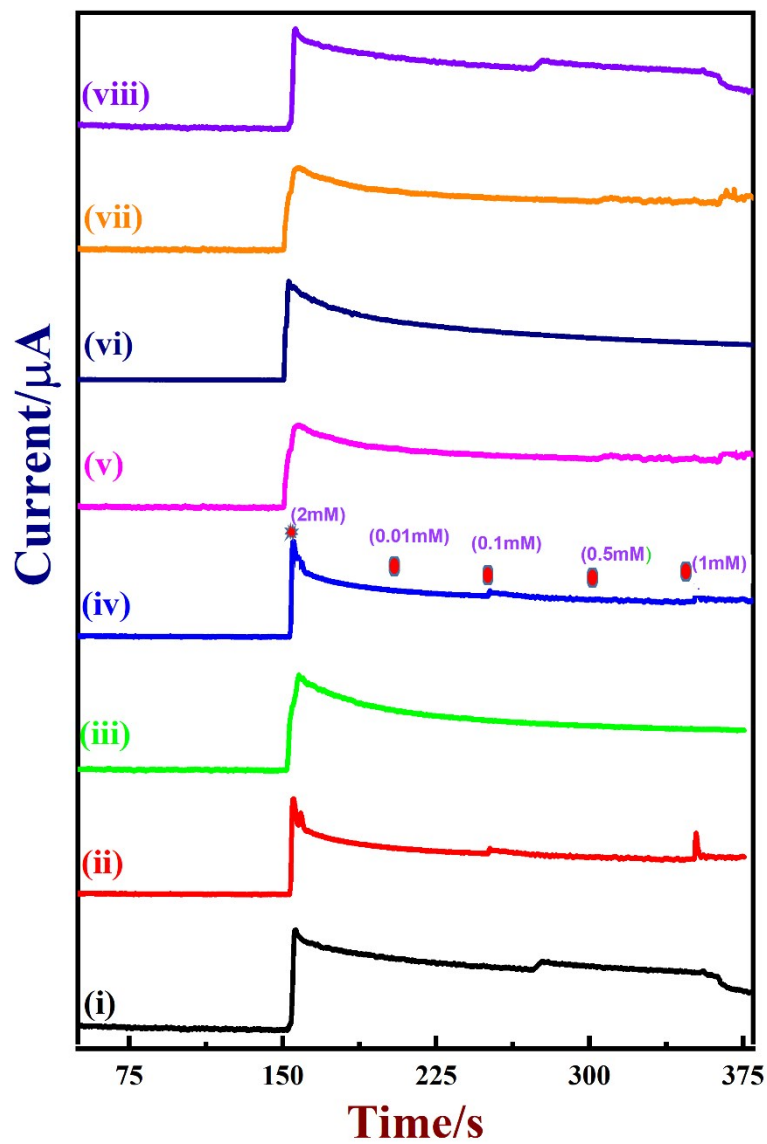

**Fig. S9.** Amperometric response of the NiO/MoS<sub>2</sub>/GCE in 0.1 M NaOH in the presence of glucose (2 mM) and followed by successive additions of interferent compounds with various concentrations from 0.01 mM to 1 mM. (i) L-cysteine, (ii) alanine, (iii) hydrogen peroxide, (iv) fructose, (v) lactose, (vi) ascorbic acid, (vii) uric acid and (viii) dopamine.

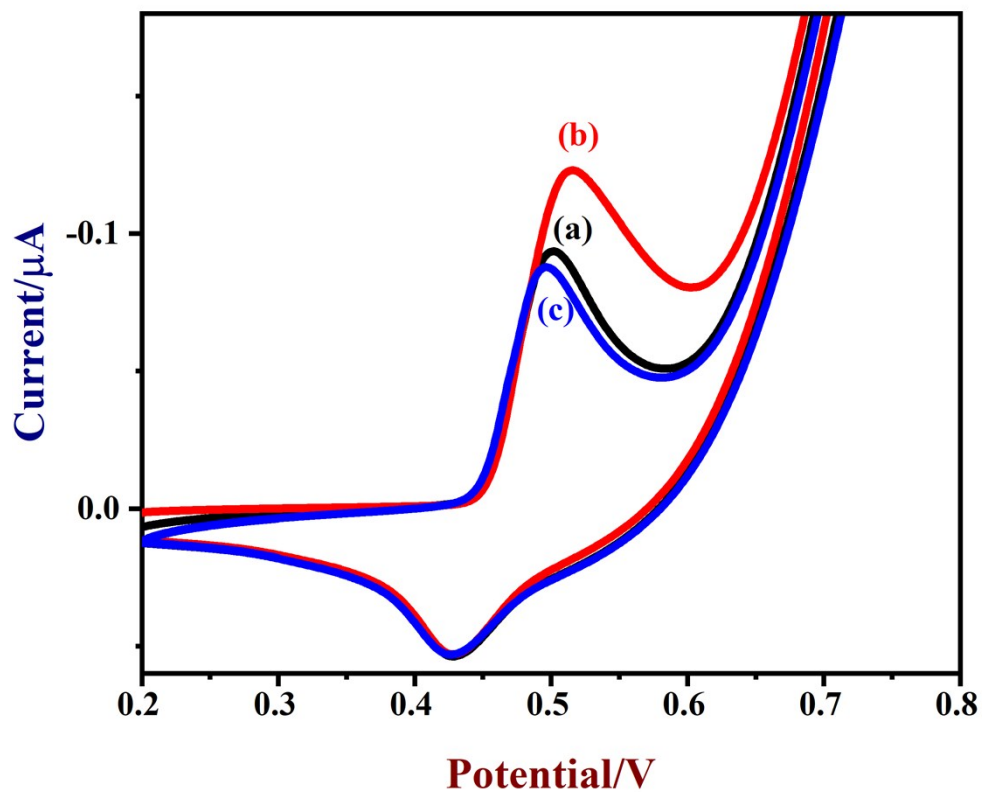

**Fig. S10** CVs recorded using a NiO/MoS<sub>2</sub>/GCE in the absence (curve a) and presence of 50 μM glucose (curve b) in 0.1 M NaOH. After glucose oxidation, the same NiO/MoS<sub>2</sub>/GCE was reused to record CVs in a fresh 0.1 M NaOH (curve c). It was found that NiO oxidation current was decreased a little bit compared to the blank. Scan rate = 50 mV/s.
